# Supplementary material for: Holarctic Species in the Pluteus romellii Clade. Five New Species Described and Old Names Reassessed
Source: MDPI journal article supplement (doi:10.3390/jof8080773), 2022-07-25
Supplement: s1 [file s1]

**Table S1.** Summary of *Pluteus* collections used in the phylogenetic analyses. Sequences marked with an \* were newly generated for this study.

| <b>Taxon</b>              | <b>Collection</b>       | <b>Country</b>        | <b>nrITS</b> | <b>TEF1<math>\alpha</math></b> |
|---------------------------|-------------------------|-----------------------|--------------|--------------------------------|
| <i>P. aff. romellii</i>   | AJ 215                  | Spain                 | HM562054     | ON813269*                      |
| <i>P. aff. romellii</i>   | BRNM 792987             | Czech Republic        | ON864083*    | ON813272*                      |
| <i>P. aff. romellii</i>   | LB 15121104             | Spain                 | ON864082*    | ON813271*                      |
| <i>P. aff. romellii</i>   | LE 215032               | Russia (Europe)       | ON864086*    | -                              |
| <i>P. aff. romellii</i>   | LE 217944               | Russia (Europe)       | FJ774073     | -                              |
| <i>P. aff. romellii</i>   | LE 303660               | Russia (Siberia)      | KX216326     | -                              |
| <i>P. aff. romellii</i>   | LE 312975               | Russia (Far East)     | ON864081*    | ON813270*                      |
| <i>P. aff. romellii</i>   | LE 313340               | Russia (Far East)     | ON864084*    | ON813273*                      |
| <i>P. aff. romellii</i>   | LE 313355               | Russia (Far East)     | ON864085*    | ON813275*                      |
| <i>P. aff. romellii</i>   | LE 313599               | Russia (Siberia)      | ON864087*    | ON813268*                      |
| <i>P. aff. romellii</i>   | OKA-TR0820              | Turkey                | ON864088*    | -                              |
| <i>P. aff. romellii</i>   | OKA-TR21                | Turkey                | ON864090*    | -                              |
| <i>P. aff. romellii</i>   | OKA-TR438               | Turkey                | ON864091*    | ON813274*                      |
| <i>P. aff. romellii</i>   | OKA-TR821               | Turkey                | ON864089*    | -                              |
| <i>P. aff. romellii</i>   | TNS-F-12387             | Japan                 | HM562123     | -                              |
| <i>P. aurantiorugosus</i> | AJ 219                  | Spain                 | HM562041     | -                              |
| <i>P. aurantiorugosus</i> | AJ 598                  | USA, New York         | KM983697     | -                              |
| <i>P. aurantiorugosus</i> | Bigelow 19232           | USA,<br>Massachusetts | HM562072     | -                              |
| <i>P. aurantiorugosus</i> | Environmental<br>sample | Estonia               | UDB023616    | -                              |
| <i>P. aurantiorugosus</i> | FG 10-2011              | Italy                 | ON864102*    | -                              |
| <i>P. aurantiorugosus</i> | GDGM41547               | China                 | MK791275     | -                              |
| <i>P. aurantiorugosus</i> | GM 2580                 | Spain                 | ON864101*    | -                              |
| <i>P. aurantiorugosus</i> | GM 2692                 | Spain                 | ON864100*    | -                              |
| <i>P. aurantiorugosus</i> | Hoseny 1740             | USA, Michigan         | HM562074     | -                              |
| <i>P. aurantiorugosus</i> | ILLS 42433              | USA, Illinois         | HM562081     | -                              |

| <b>Taxon</b>                                             | <b>Collection</b>           | <b>Country</b>    | <b>nrITS</b> | <b>TEF1<math>\alpha</math></b> |
|----------------------------------------------------------|-----------------------------|-------------------|--------------|--------------------------------|
| <i>P. aurantiorugosus</i>                                | iNaturalist<br>30774897     | USA, Indiana      | ON006971     | -                              |
| <i>P. aurantiorugosus</i>                                | LE 312803                   | Russia (Far East) | ON864105*    | -                              |
| <i>P. aurantiorugosus</i>                                | LE 312815                   | Russia (Europe)   | ON864103*    | ON813296*                      |
| <i>P. aurantiorugosus</i>                                | LE 313555                   | Russia (Siberia)  | ON864104*    | -                              |
| <i>P. aurantiorugosus</i>                                | Mushroom<br>Observer 110540 | USA, Indiana      | ON006945     | -                              |
| <i>P. aurantiorugosus</i>                                | TNS-F 12391                 | Japan             | HM562121     | -                              |
| <i>P. aurantiorugosus</i>                                | Voucher 2847                | Italy             | JF908613     | -                              |
| <i>P. aurantiorugosus</i>                                | Voucher 880                 | Italy             | JF908608     | -                              |
| <i>P. aurantiorugosus</i><br><i>var. aurantiovelatus</i> | TO AVPP211                  | Italy             | HQ654907     | -                              |
| <i>P. aurantiorugosus</i><br><i>var. aurantiovelatus</i> | TO AVPP212                  | Italy             | HQ654908     | -                              |
| <i>P. aureovenatus</i>                                   | SP 393697                   | Brazil            | FJ816663     | KJ010056                       |
| <i>P. aureovenatus</i>                                   | SP 394388                   | Brazil            | HM562160     | -                              |
| <i>P. aureovenatus</i>                                   | SP 416735                   | Brazil            | KM983702     | -                              |
| <i>P. austrofulvus</i>                                   | AJ 857                      | USA, Arkansas     | KM983701     | ON813290*                      |
| <i>P. austrofulvus</i>                                   | AJ 860                      | USA, Arkansas     | KM983699     | ON813288*                      |
| <i>P. austrofulvus</i>                                   | AJ 864                      | USA, Arkansas     | KM983700     | ON813289*                      |
| <i>P. austrofulvus</i>                                   | iNaturalist<br>112016967    | USA, Georgia      | ON864095*    | ON813291*                      |
| <i>P. austrofulvus</i>                                   | iNaturalist<br>112219822    | USA, Tennessee    | ON864096*    | ON813292*                      |
| <i>P. austrofulvus</i>                                   | iNaturalist<br>112280046    | USA, Tennessee    | ON864097*    | ON813293*                      |
| <i>P. austrofulvus</i>                                   | iNaturalist<br>34997248     | USA, Indiana      | ON006963     | -                              |
| <i>P. austrofulvus</i>                                   | Minnis 6-09-23-3<br>(SIU)   | USA, Illinois     | HM562183     | -                              |

| <b>Taxon</b>               | <b>Collection</b>           | <b>Country</b>              | <b>nrITS</b>        | <b>TEF1<math>\alpha</math></b> |
|----------------------------|-----------------------------|-----------------------------|---------------------|--------------------------------|
| <i>P. austrofulvus</i>     | Sundberg X-24-1981-12 (ILL) | USA, Missouri               | HM562105            | -                              |
| <i>P. castaneorugosus</i>  | LE 313071                   | Vietnam                     | MT611237            | -                              |
| <i>P. fulvibadius</i>      | AJ 815                      | USA, California             | KM983698            | ON813285*                      |
| <i>P. fulvibadius</i>      | HRL3391                     | Canada, Québec              | ON864094*           | ON813287*                      |
| <i>P. fulvibadius</i>      | JLF 4229                    | USA, Oregon                 | MK634598            | -                              |
| <i>P. fulvibadius</i>      | MCBS-167 (MIN)              | USA, Minnesota              | MIN055-09<br>(BOLD) | -                              |
| <i>P. fulvibadius</i>      | MO 270623                   | USA, Colorado               | ON864093*           | ON813286*                      |
| <i>P. fulvibadius</i>      | R.L. Shaffer 3715<br>(MICH) | USA, Michigan               | HM562078            | -                              |
| <i>P. fulvibadius</i>      | UBC-F-33234                 | Canada, British<br>Columbia | MG953973            | -                              |
| <i>P. fulvibadius</i>      | UC 1861229                  | USA, California             | KC147675            | -                              |
| <i>P. fulvibadius</i>      | UCSC-F-00818                | USA, California             | ON864092*           | -                              |
| <i>P. globiger</i>         | ICN139025                   | Brazil                      | JQ065030            | -                              |
| <i>P. iguazuensis</i>      | NK I10                      | Brazil                      | KM983704            | -                              |
| <i>P. pallescens</i>       | K (M) 93678                 | UK, England                 | ON864073*           | -                              |
| <i>P. parvicarpus</i>      | LE 313357                   | Russia                      | ON864114*           | ON813302*                      |
| <i>P. parvicarpus</i>      | LE 313631                   | Russia                      | ON864115*           | ON813303*                      |
| <i>P. parvisporus</i>      | AJ 855                      | USA, Arkansas               | ON864099*           | ON813295*                      |
| <i>P. parvisporus</i>      | iNaturalist<br>112236342    | USA, Tennessee              | ON864098*           | ON813294*                      |
| <i>P. parvisporus</i>      | iNaturalist<br>27586123     | USA, Indiana                | ON007017            | -                              |
| <i>P. paucicystidiatus</i> | SP 394383                   | Brazil                      | HM562173            | -                              |
| <i>P. pauperculus</i>      | JAC11068                    | New Zealand                 | MN738636            | -                              |
| <i>P. pauperculus</i>      | JAC9790                     | New Zealand                 | MN738621            |                                |
| <i>P. phlebophorus</i>     | AJ81                        | Spain                       | HM562039            | ON133554                       |

| <b>Taxon</b>                                 | <b>Collection</b>       | <b>Country</b>       | <b>nrITS</b> | <b>TEF1<math>\alpha</math></b> |
|----------------------------------------------|-------------------------|----------------------|--------------|--------------------------------|
| <i>P. romellii</i>                           | AJ 232                  | Spain                | HM562062     | ON813280*                      |
| <i>P. romellii</i>                           | BRNM 761731             | Czech Republic       | ON864065*    | ON813278*                      |
| <i>P. romellii</i>                           | BRNM 816205             | Czech Republic       | ON864063*    | ON813276*                      |
| <i>P. romellii</i>                           | BRNM 817530             | Slovakia             | ON864072*    | ON813282*                      |
| <i>P. romellii</i>                           | BRNM 825844             | Czech Republic       | ON864066*    | -                              |
| <i>P. romellii</i>                           | BRNM 825845             | Slovakia             | ON864070*    | ON813281*                      |
| <i>P. romellii</i>                           | BRNM 825846             | Czech Republic       | ON864067*    | ON813279*                      |
| <i>P. romellii</i>                           | Environmental<br>Sample | Estonia              | UDB015327    | -                              |
| <i>P. romellii</i>                           | Environmental<br>Sample | Estonia              | UDB011747    | -                              |
| <i>P. romellii</i>                           | FG 121020175            | Italy                | ON864069*    | -                              |
| <i>P. romellii</i>                           | FG 1404201017           | Italy                | ON864068*    | -                              |
| <i>P. romellii</i>                           | GM 2555                 | Spain                | ON864062*    | -                              |
| <i>P. romellii</i>                           | LE 262701               | Russia<br>(Caucasus) | ON864071*    | -                              |
| <i>P. romellii</i>                           | OKA-TR1445              | Turkey               | ON864078*    | -                              |
| <i>P. romellii</i>                           | OKA-TR1446              | Turkey               | ON864079*    | -                              |
| <i>P. romellii</i>                           | OKA-TR161               | Turkey               | ON864076*    | -                              |
| <i>P. romellii</i>                           | OKA-TR162               | Turkey               | ON864077*    | -                              |
| <i>P. romellii</i>                           | OKA-TR447               | Turkey               | ON864080*    | ON813283*                      |
| <i>P. romellii</i>                           | OKA-TRAB8               | Turkey               | ON864075*    | -                              |
| <i>P. romellii</i>                           | OK-TR740                | Turkey               | ON864074*    | ON813284*                      |
| <i>P. romellii</i>                           | PC 0714852              | UK, England          | ON864064*    | ON813277*                      |
| <i>P. romellii</i> f. <i>albidus</i>         | MCVE 28336              | Italy                | KM035790     | -                              |
| <i>P. romellii</i> var.<br><i>luteoalbus</i> | BRNM 788199             | Czech Republic       | LT838190     | -                              |
| <i>P. rugosidiscus</i>                       | BRNM761706              | Slovakia             | MH010876     | LT991752                       |
| <i>P. siccus</i>                             | LE 313356               | Russia               | ON864113*    | ON813301*                      |

| <b>Taxon</b>            | <b>Collection</b>           | <b>Country</b>       | <b>nrITS</b>         | <b>TEF1<math>\alpha</math></b> |
|-------------------------|-----------------------------|----------------------|----------------------|--------------------------------|
| <i>P. stenotrichus</i>  | AJ 352                      | Dominican Republic   | JN603201             | -                              |
| <i>P. sternbergii</i>   | PRM 154258                  | Czech Republic       | ON864116*            | -                              |
| <i>P. sublaevigatus</i> | SP 393694                   | Brazil               | FJ816667             | -                              |
| <i>P. vellingae</i>     | BRNM 817769                 | Czech Republic       | ON864108*            | ON813297*                      |
| <i>P. vellingae</i>     | ECV 3201                    | USA, California      | AY854065             | AY883433                       |
| <i>P. vellingae</i>     | FG 07102019011              | Slovenia             | ON818995*            | -                              |
| <i>P. vellingae</i>     | FG 111120177                | Croatia              | ON818996*            | -                              |
| <i>P. vellingae</i>     | FG 14102018268              | Slovenia             | ON818997*            | -                              |
| <i>P. vellingae</i>     | FG02092019008               | Slovenia             | ON864112*            | ON813299*                      |
| <i>P. vellingae</i>     | GM 3260                     | Spain                | ON864107*            | ON813298*                      |
| <i>P. vellingae</i>     | HRL1462                     | Canada, Quebec       | ON864111*            | -                              |
| <i>P. vellingae</i>     | iNaturalist<br>15112653     | USA, Indiana         | ON006951             | -                              |
| <i>P. vellingae</i>     | iNaturalist<br>92133943     | USA, Indiana         | OM972345             | -                              |
| <i>P. vellingae</i>     | Mushroom<br>Observer 281889 | USA,<br>Pennsylvania | ON864106*            | -                              |
| <i>P. vellingae</i>     | MycoMap 6997                | USA, Indiana         | MK564587             | -                              |
| <i>P. vellingae</i>     | OKA-TR512                   | Turkey               | -                    | ON813300*                      |
| <i>P. vellingae</i>     | OKA-TROKA1                  | Turkey               | ON864110*            | -                              |
| <i>P. vellingae</i>     | OK-TRBA                     | Turkey               | ON864109*            | -                              |
| <i>P. vellingae</i>     | TRTC 155719                 | Canada, Ontario      | ONT270-08,<br>(BOLD) | -                              |
| <i>Pluteus</i> sp.      | AJ 842                      | Dominican Republic   | KM983705             | -                              |
| <i>Pluteus</i> sp.      | SP 416739                   | Brazil               | KM983703             | -                              |
